# Supplementary material
Source: Springer Nature journal article supplement (https://www.springermedizin.de/resource/supplementary/12933_2009_177_MOESM5_ESM.pdf/9539764)

FMD

hsCRP

VCAM-1

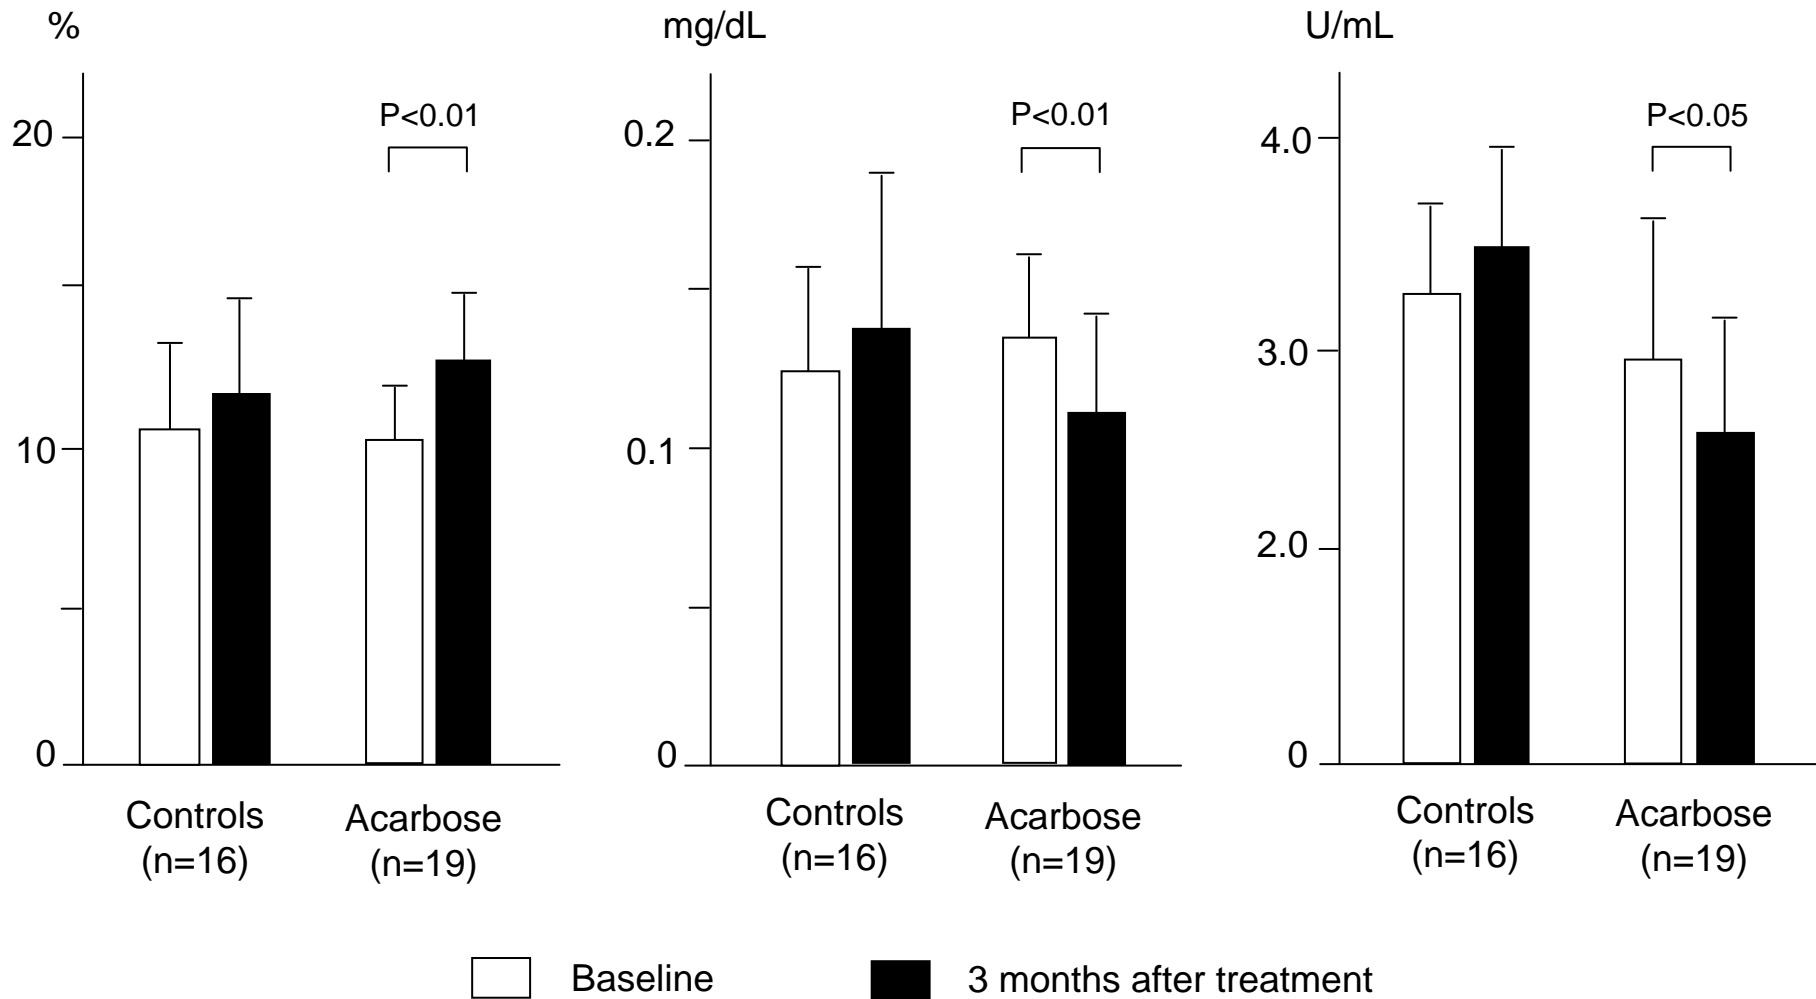

Supplement: MOESM5 [file 9539764]
